# Supplementary material for: A tri-site fluorescent probe for simultaneous sensing of hydrogen sulfide and glutathione and its bioimaging applications
Source: Royal Society of Chemistry journal article supplement (doi:10.1039/c7an01588g), 2017-12-08
Supplement: c7an01588g1.pdf [file c7an01588g1.pdf]

## Supplementary Information

### Trinal-site fluorescent probe for simultaneous sensing of hydrogen sulfide and glutathione and its bioimaging applications

Fengzao Chen<sup>a, b</sup>, Deman Han<sup>a\*</sup>, Heng Liu<sup>b</sup>, Shengfu Wang<sup>b</sup>, Kaibin Li<sup>a</sup>, Siqi Zhang<sup>a</sup>,

Wei Shi<sup>a</sup>

<sup>a</sup> Department of Chemistry, Taizhou University, Jiaojiang, 318000, PR China.

<sup>b</sup> College of Chemistry and Chemical Engineering, Hubei University, Wuhan 430062, PR China.

\*Corresponding author: [hdmztzc@126.com](mailto:hdmztzc@126.com)

#### Contents

|                                                 |      |
|-------------------------------------------------|------|
| Synthesis.....                                  | S-2  |
| Characterization.....                           | S-2  |
| <sup>1</sup> H-NMR spectrum of compound 1.....  | S-2  |
| <sup>1</sup> H-NMR spectrum of compound 2.....  | S-3  |
| <sup>1</sup> H-NMR spectrum of probe FZ-1.....  | S-3  |
| <sup>13</sup> C-NMR spectrum of probe FZ-1..... | S-4  |
| HRMS spectrum of probe FZ-1.....                | S-4  |
| Optimization of the buffer system.....          | S-5  |
| Fluorescence Analysis.....                      | S-7  |
| HRMS Spectrum of the Reaction Mixture.....      | S-10 |
| Results from Cell Viability Assays.....         | S-12 |
| Table of comparison of fluorescent probe.....   | S-12 |

## Synthesis

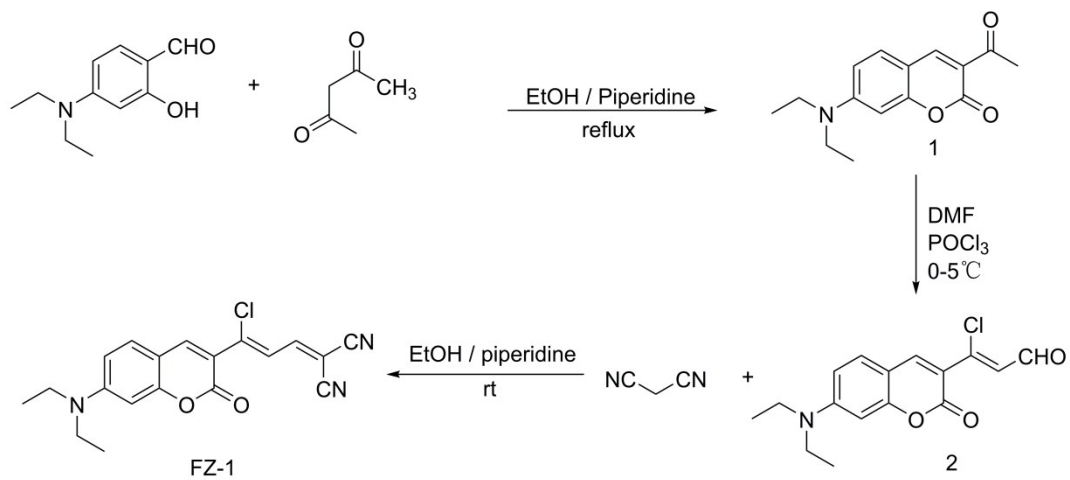

## Synthesis of probe **FZ-1**

## Characterization

### <sup>1</sup>H/ <sup>13</sup>C NMR and HRMS spectra of compound **1**, compound **1** and probe **FZ-1**

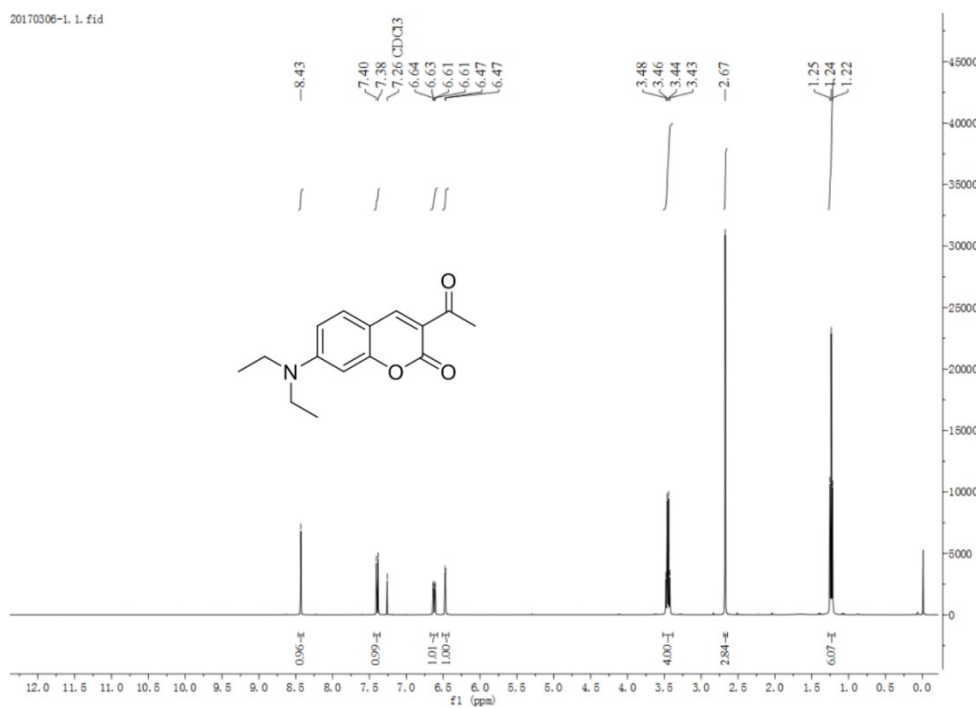

<sup>1</sup>H-NMR spectrum of compound **1** in CDCl<sub>3</sub>

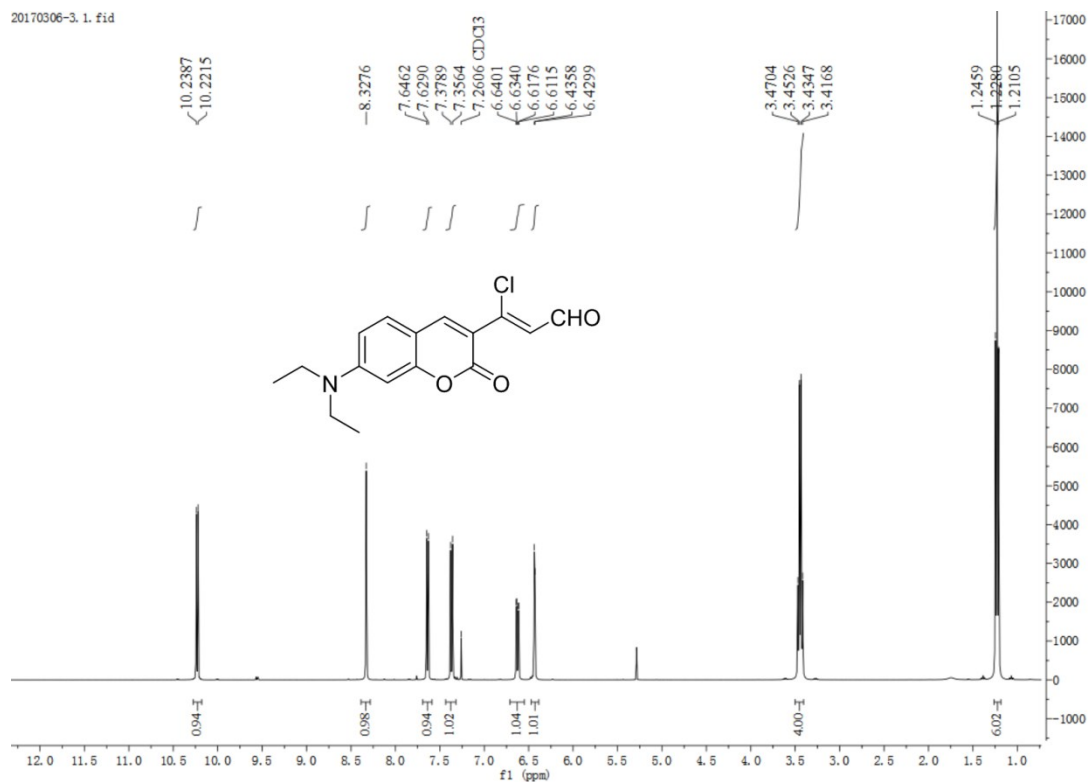

<sup>1</sup>H-NMR spectrum of compound **2** in CDCl<sub>3</sub>

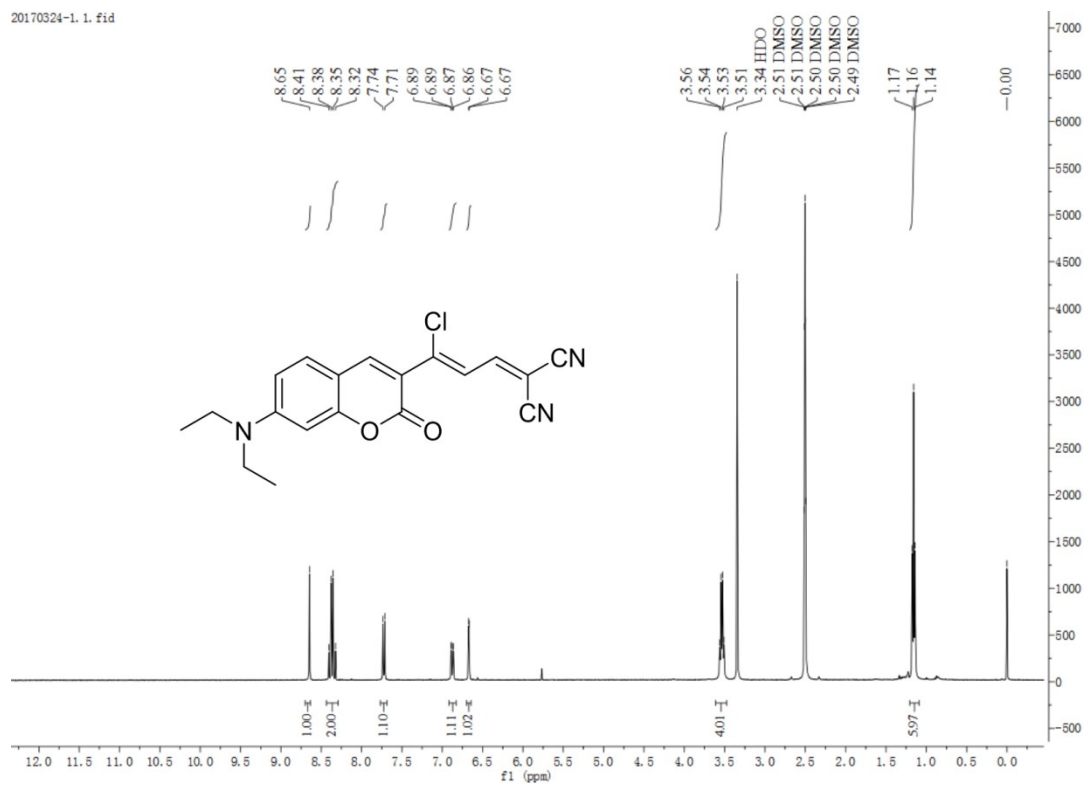

<sup>1</sup>H-NMR spectrum of probe **FZ-1** in DMSO-*d*<sub>6</sub>

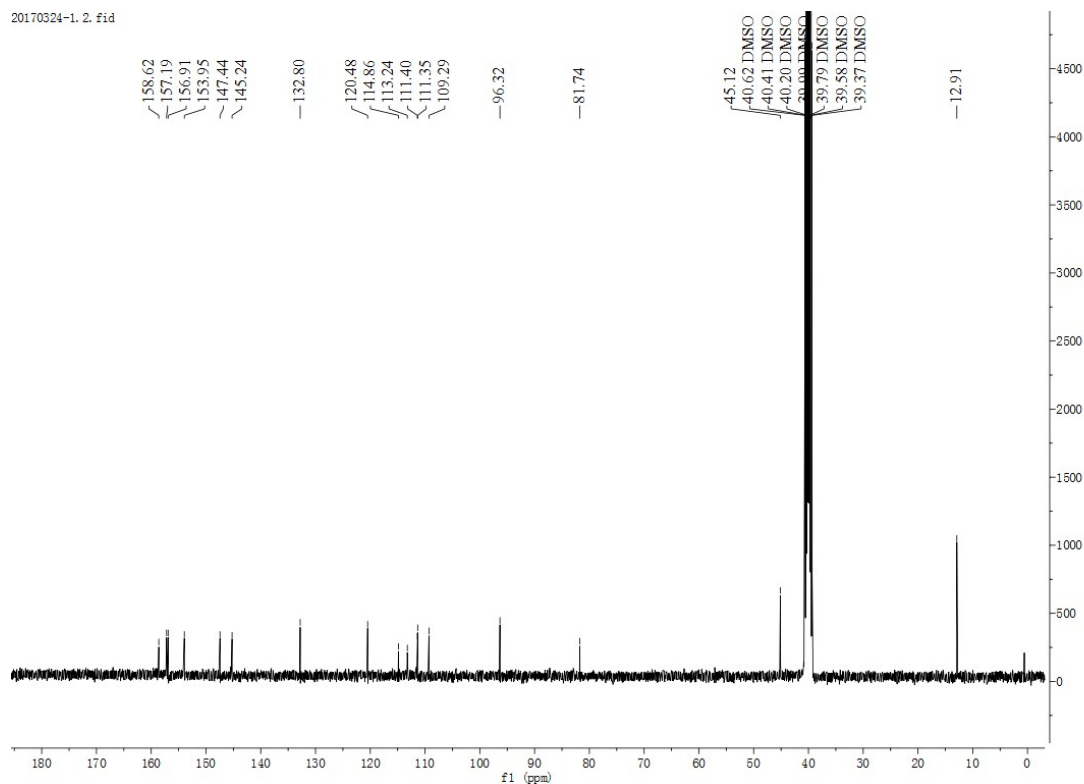

$^{13}\text{C}$ -NMR spectrum of probe **FZ-1** in  $\text{DMSO}-d_6$

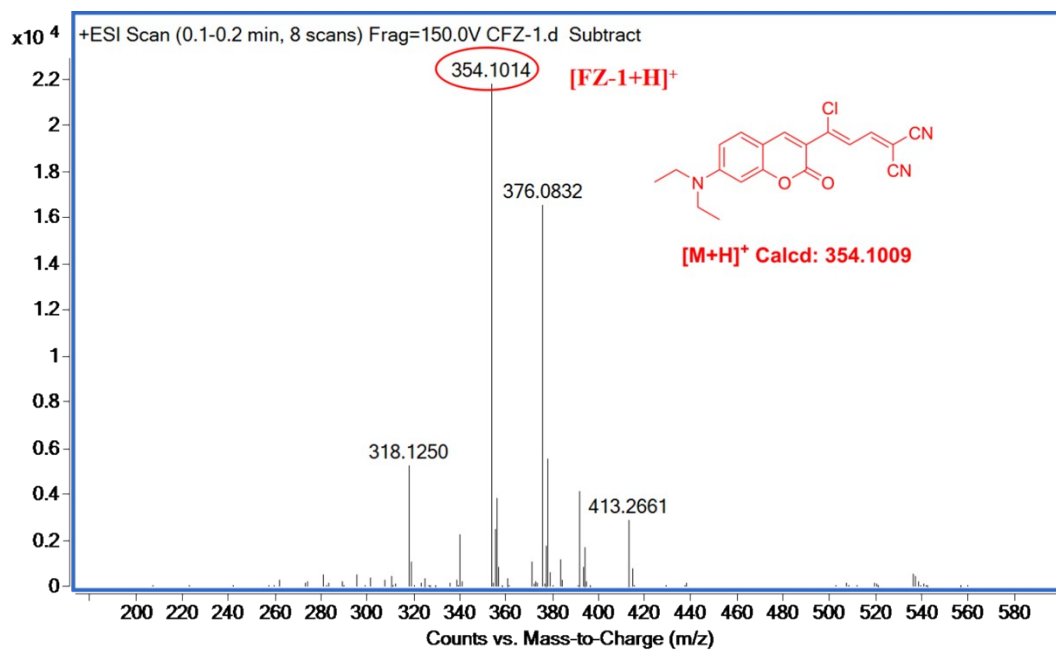

HRMS spectrum of probe **FZ-1**

## Optimization of the buffer system

It is a common phenomenon that the solvation effects have significant effect on some reactive fluorescent probes. Meixing Li et al.<sup>1</sup> have presented a ratiometric fluorescent probe that sense  $\text{SO}_3^{2-}$  /  $\text{HSO}_3^-$  and the probe also can detect hydrazine simultaneously in different buffer solutions according to the latest work of Yangyang He et al.<sup>2</sup>. In this work, the influence of solvent polarity on the probe **FZ-1** is particularly obvious. We had optimized the solvent-buffer of the reaction system before other spectra were tested, and the results as shown in Fig. 1 and Fig. 2 as follows: the probe **FZ-1** could response well to  $\text{H}_2\text{S}$  in weak polar organic solvent-buffer such as THF/PBS buffer (v/v=1:1, 10 mM, pH=7.4) and acetonitrile/PBS buffer (v/v=1:1, 10 mM, pH=7.4). However, the probe **FZ-1** hardly responds to  $\text{H}_2\text{S}$  in strong polar solvent-buffer such as DMSO/PBS buffer (v/v=1:1, 10 mM, pH=7.4). On the contrary, the probe **FZ-1** could response well to GSH in strong polar solvent-buffer of DMSO/PBS (v/v=1:1, 10 mM, pH=7.4) but hardly responds to GSH in weak polar organic solvent-buffer of acetonitrile/PBS (v/v=1:1, 10 mM, pH=7.4). Considering these results, we chose the optimal solvent buffer for subsequent spectral tests which can detect the  $\text{H}_2\text{S}$  in the weak polar organic solvent-buffer of acetonitrile/PBS (v/v=1:1, 10 mM, pH=7.4) and sense the GSH in the strong polar organic solvent-buffer of DMSO/PBS (v/v=1:1, 10 mM, pH=7.4).

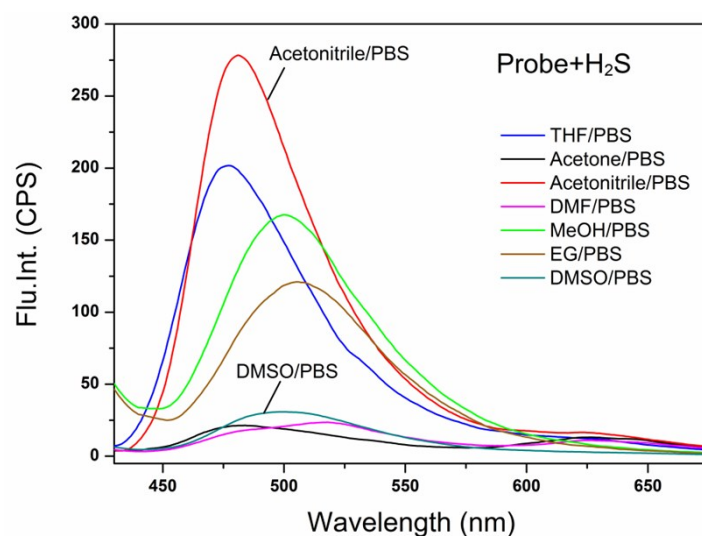

**Fig. 1** Fluorescent spectra response of probe **FZ-1** (10  $\mu$ M) for H<sub>2</sub>S (50  $\mu$ M) in the various organic solvent-buffer (solvent/PBS, v/v=1:1, 10 mM, pH=7.4),  $E_x$  = 420 nm, Slits: 5/5 nm.

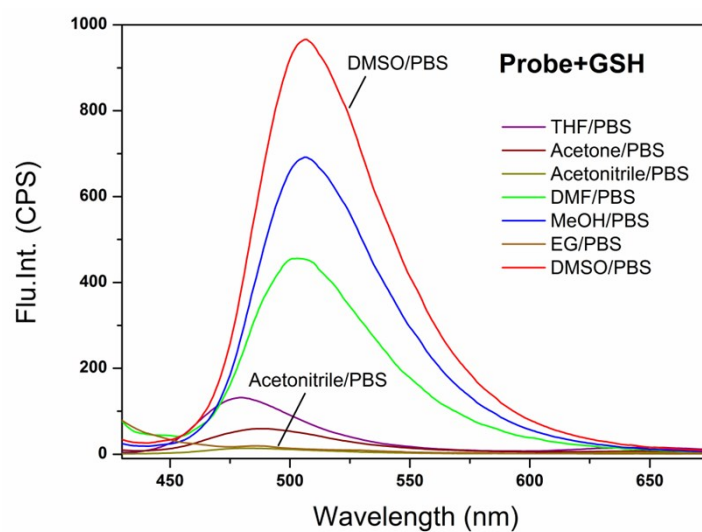

**Fig. 2** Fluorescent spectra response of probe **FZ-1** (10  $\mu$ M) for GSH (30  $\mu$ M) in the various organic solvent-buffer (solvent/PBS, v/v=1:1, 10 mM, pH=7.4),  $E_x$  = 420 nm, Slits: 5/5 nm.

## Fluorescence Analysis

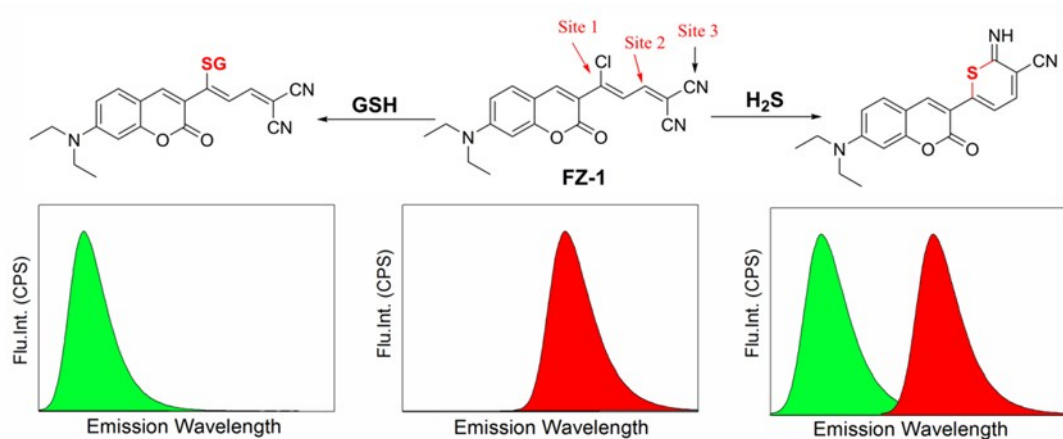

**Fig. 3** The spectral sensing properties of the probe **FZ-1** for H<sub>2</sub>S and GSH

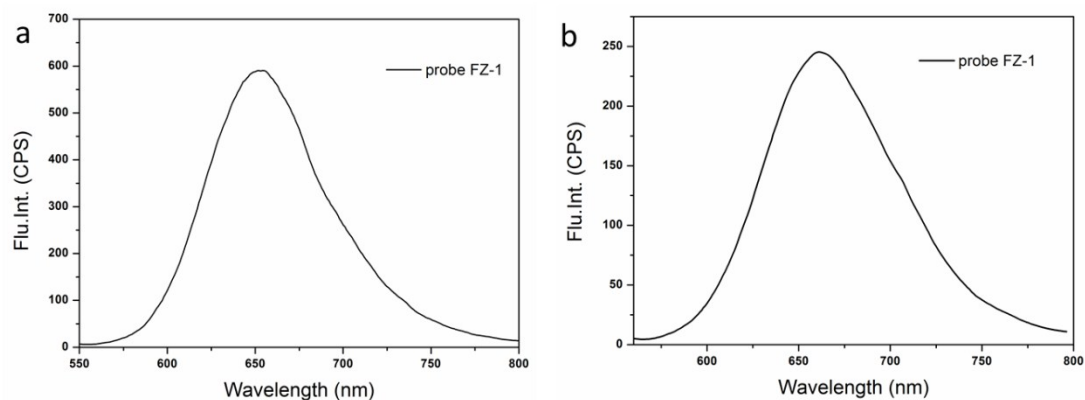

**Fig. 4** The fluorescence spectrum of free probe **FZ-1**, (a) in the CH<sub>3</sub>CN/PBS buffer solution (v/v 1:1, 10 mM, pH=7.4); (b) the in DMSO/PBS buffer solution (v/v=1:1, 10 mM, pH=7.4). E<sub>x</sub> = 530 nm, Slits: 5/5 nm.

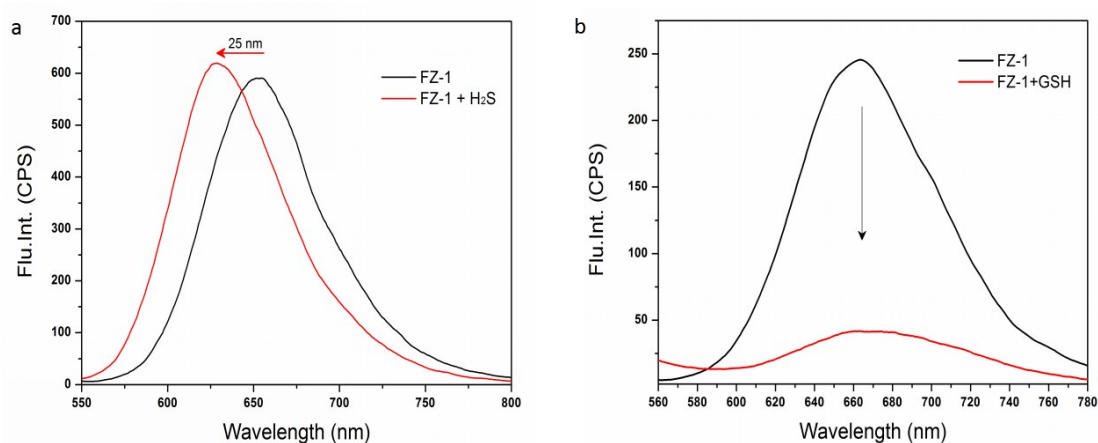

**Fig. 5** The fluorescence spectrum of probe **FZ-1** react with H<sub>2</sub>S and GSH respectively.

(a) probe **FZ-1** react with H<sub>2</sub>S in the CH<sub>3</sub>CN/PBS buffer solution (v/v 1:1, 10 mM, pH=7.4); (b) probe **FZ-1** react with GSH in the DMSO/PBS buffer solution (v/v 1:1, 10 mM, pH=7.4).  $E_x = 530$  nm, Slits: 5/5 nm.

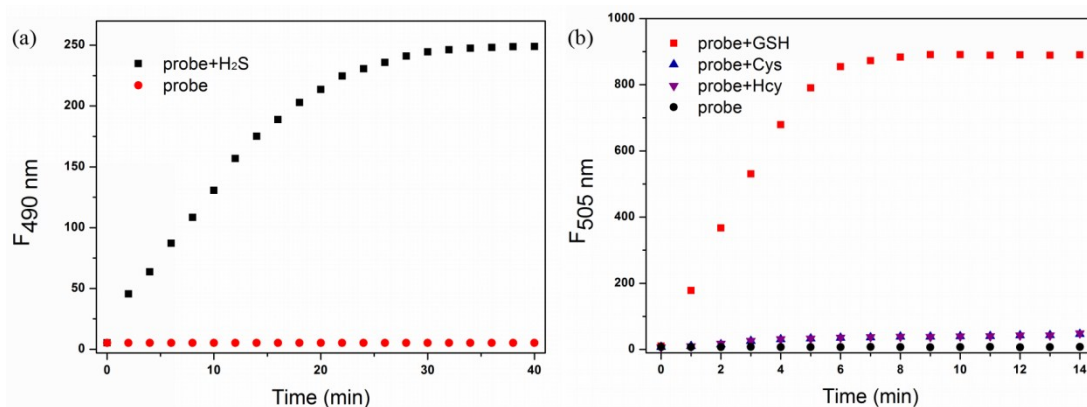

**Fig. 6** (a) The fluorescence intensity changes of probe **FZ-1** (10 μM) treated with H<sub>2</sub>S (50 μM) at 490 nm in the CH<sub>3</sub>CN/PBS buffer solution, (b) The fluorescence intensity changes of probe **FZ-1** (10 μM) treated with GSH, Cys and Hcy (50 μM) at 505 nm in the DMSO/PBS buffer solution.  $E_x = 530$  nm, Slits: 5/5 nm.

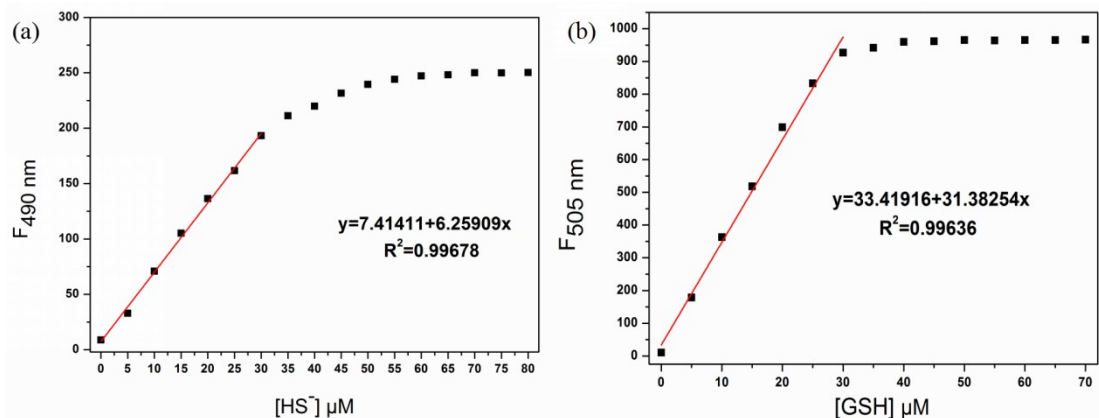

**Fig. 7** (a) The working curve of probe **FZ-1** at 490 nm with  $\text{H}_2\text{S}$ , (b) The working curve of probe **FZ-1** at 505 nm with GSH.  $E_x = 530 \text{ nm}$ , Slits: 5/5 nm.

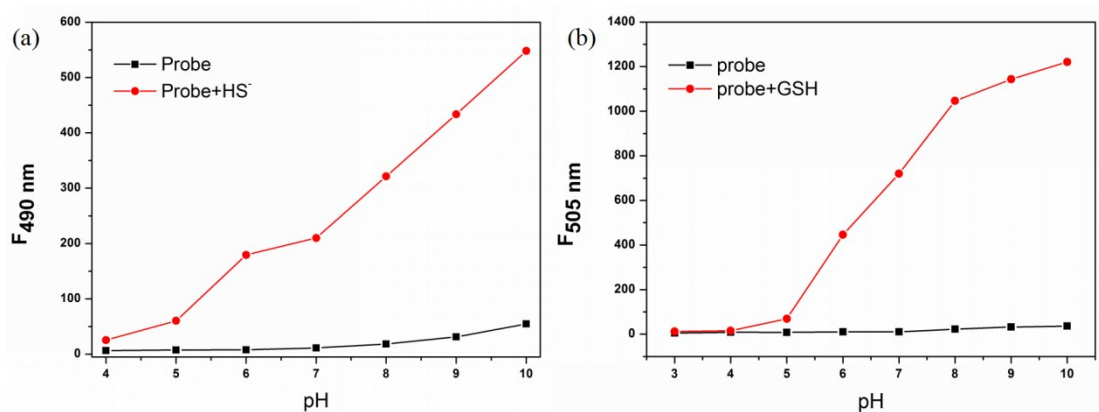

**Fig. 8** (a) Effect of pH on the fluorescence increment of probe **FZ-1** (10  $\mu\text{M}$ ) treatment with  $\text{H}_2\text{S}$  (50  $\mu\text{M}$ ) in the  $\text{CH}_3\text{CN}/\text{PBS}$  buffer ( $v/v=1:1$ ) solution. (b) effect of pH on the fluorescence increment of probe **FZ-1** (10  $\mu\text{M}$ ) treatment with 50  $\mu\text{M}$  of GSH, Cys and Hcy in the  $\text{DMSO}/\text{PBS}$  buffer ( $v/v=1:1$ ) solution.

## HRMS Spectrum of the Reaction Mixture

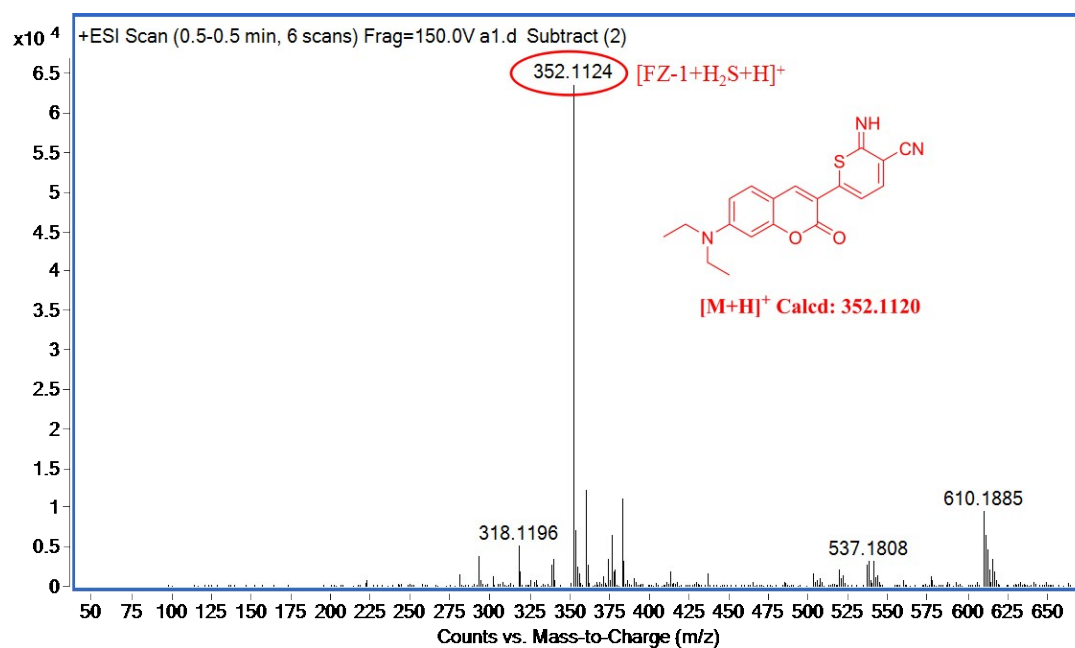

**Fig. 9** HRMS spectrum of  $[FZ-1+H_2S+H]^+$

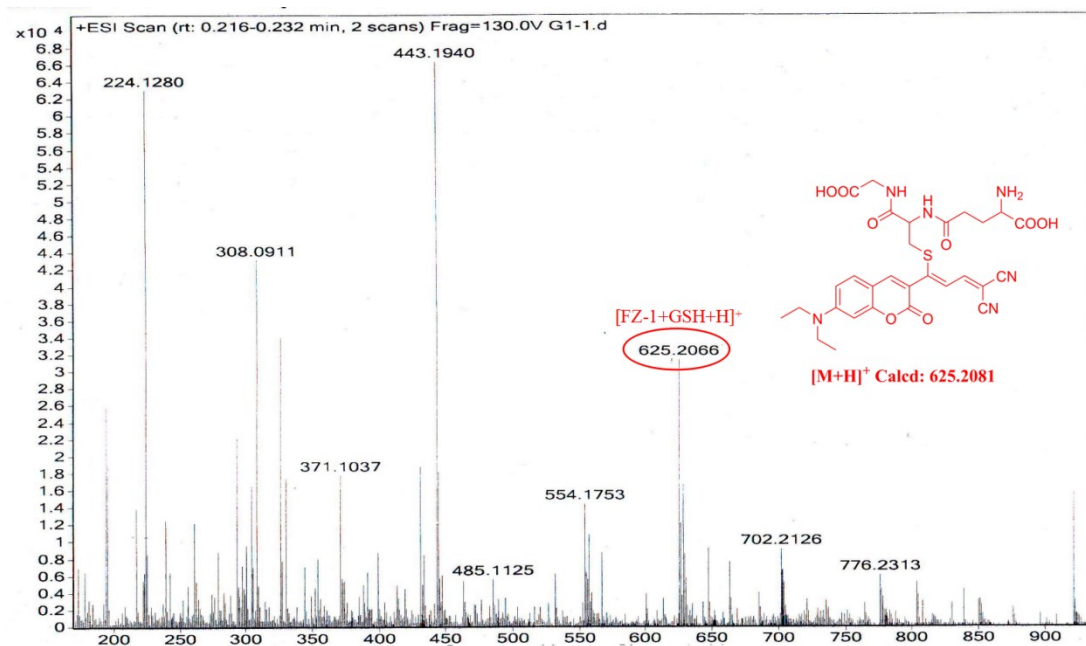

**Fig. 10** HRMS spectrum of  $[FZ-1+GSH+H]^+$

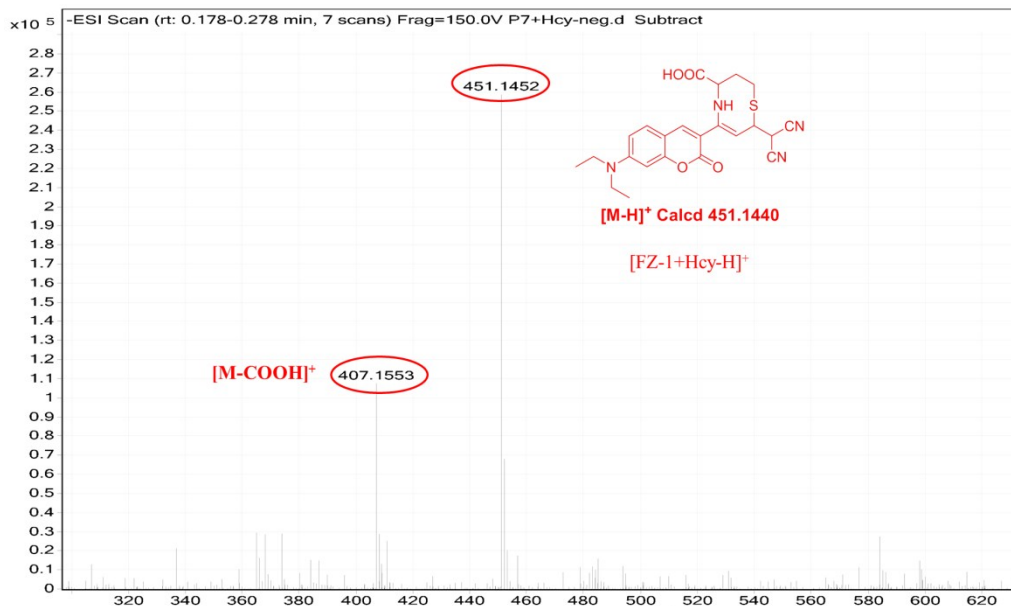

**Fig. 11** HRMS spectrum of  $[FZ-1+Hcy-H]^+$

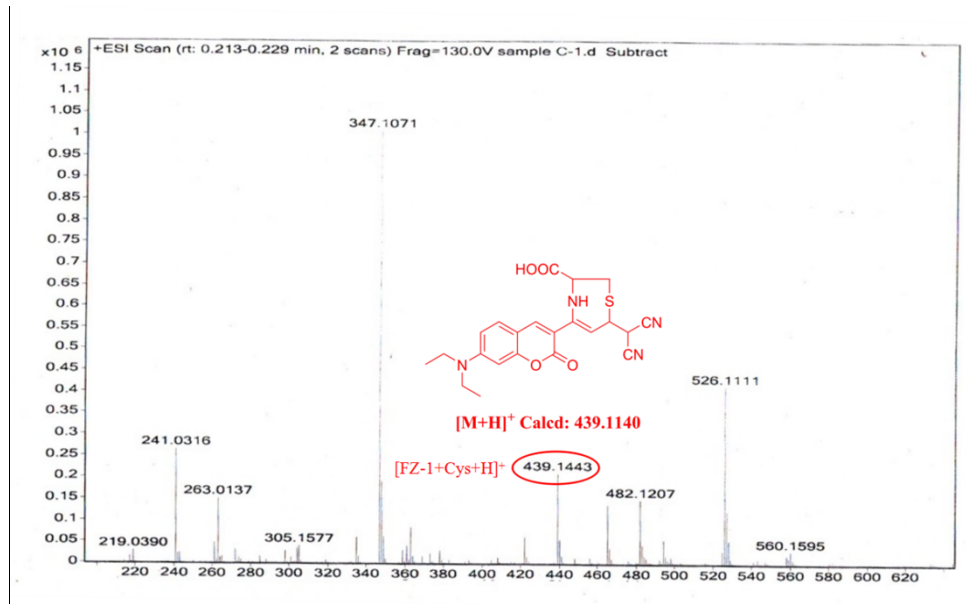

**Fig. 12** HRMS spectrum of  $[FZ-1+Cys+H]^+$

## Results from Cell Viability Assays

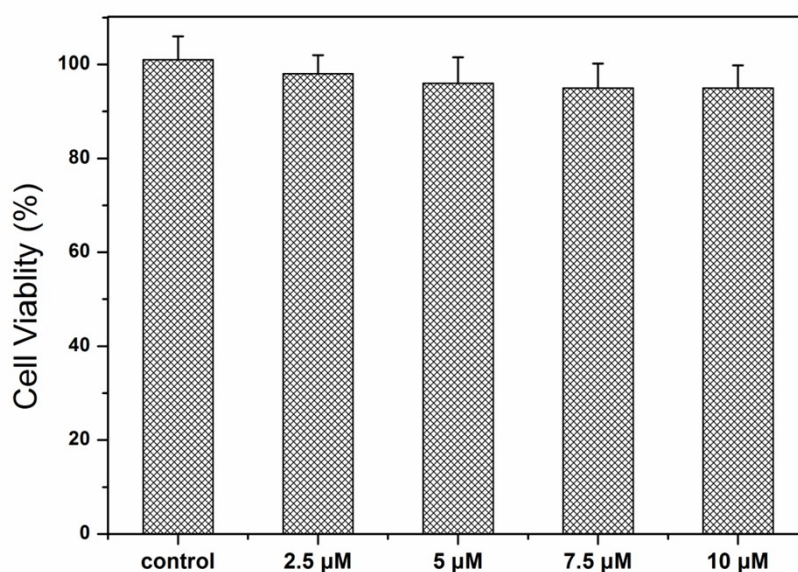

**Fig. 13** Cell viability of MCF-7 cells treated with different concentrations of probe **FZ-1** (0, 2.5, 5.0, 7.5 and 10.0  $\mu\text{M}$ ) for 12 h. The cell viability was observed via CCK-8 assay.

**Table S1. Comparison of fluorescent probe for GSH and H<sub>2</sub>S**

| Probes                                                                              | Detection system                                                                 | Target | Response time | Detection limit     | Reference                           |
|-------------------------------------------------------------------------------------|----------------------------------------------------------------------------------|--------|---------------|---------------------|-------------------------------------|
| 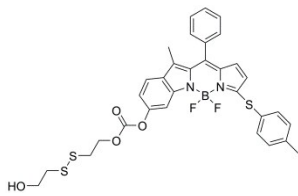 | CH <sub>3</sub> CN/HEPES buffer (1 : 1, v/v, 20 mM, pH 7.4)                      | GSH    | 200 min       | 0.85 $\mu\text{M}$  | Chem. Sci., 2015, 6, 2584           |
|  | DMSO/H <sub>2</sub> O (1 : 1, v/v) with a PBS buffer solution (10 mM, pH = 7.4). | GSH    | 5 min         | 0.018 $\mu\text{M}$ | Chem. Commun., 2014, 50, 1751       |
|  | PBS buffer (pH 7.4) containing 10% DMSO                                          | GSH    | 20 min        | 0.38 $\mu\text{M}$  | Biosens. Bioelectron. 2015, 72, 275 |

|                                                                                    |                                                               |                          |         |                                            |                                   |
|------------------------------------------------------------------------------------|---------------------------------------------------------------|--------------------------|---------|--------------------------------------------|-----------------------------------|
| 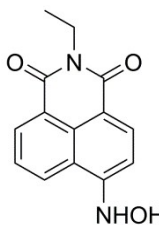  | PBS buffer (pH 7.4) containing 1% DMSO                        | H <sub>2</sub> S         | 120 min | 0.5 μM                                     | Chem. Commun., 2012, 48, 10669.   |
|   | PBS buffer (pH 7.4) containing 30% CH <sub>3</sub> CN         | H <sub>2</sub> S         | 9 min   | 0.15 μM                                    | Chem. Commun., 2015, 51, 13135.   |
|   | PBS buffer (pH 7.4) containing 10% CH <sub>3</sub> CN         | H <sub>2</sub> S         | 40 min  | 2.46 μM                                    | Anal. Chem., 2016, 88 (10), 5476. |
|  | PBS buffer (pH 7.4) containing 50% CH <sub>3</sub> CN or DMSO | H <sub>2</sub> S and GSH | 10 min  | H <sub>2</sub> S: 0.075 μM<br>GSH: 0.28 μM | This work                         |

## References

1. M. Li, W. Feng, H. Zhang and G. Feng, *Sens. Actuators. B*, 2017, **243**, 51-58.
2. Y. He, Z. Li, B. Shi, Z. An, M. Yu, L. Wei and Z. Ni, *Rsc Adv.*, 2017, **7**, 25634-25639.
